# Supplementary material
Source: Springer Nature journal article supplement (https://www.springermedizin.de/resource/supplementary/13054_2013_2456_MOESM2_ESM.pdf/9714032)

Lactate difference over monitoring time

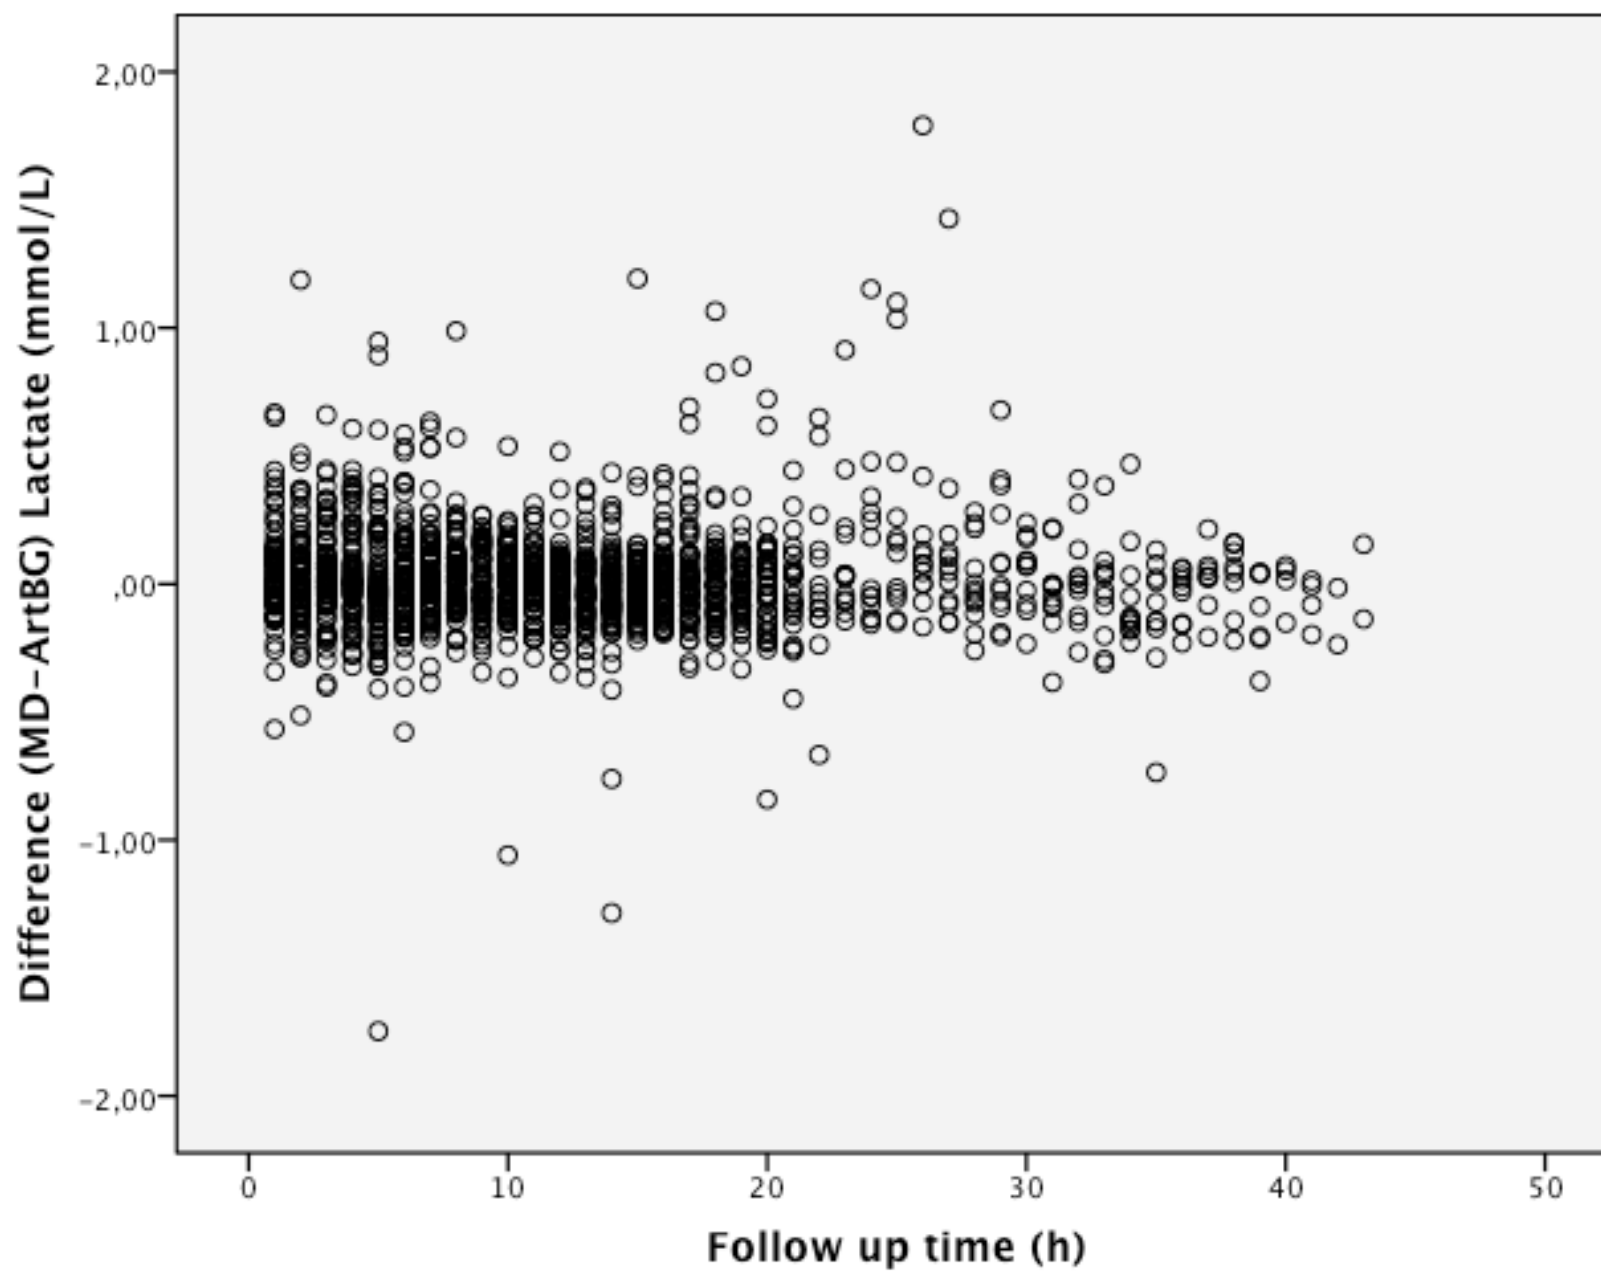

Supplement: MOESM2 [file 9714032]
